# Supplementary material for: Lateral habenula glutamatergic neurons projecting to the dorsal raphe nucleus promote aggressive arousal in mice
Source: PubMed Central journal article supplement (PMC9304121; doi:10.1038/s41467-022-31728-z), 2022-07-21
Supplement: 41467_2022_31728_MOESM1_ESM.pdf [file 41467_2022_31728_MOESM1_ESM.pdf]

## Supplementary Information

### **Lateral habenula glutamatergic neurons projecting to the dorsal raphe nucleus promote aggressive arousal in mice.**

**Supplementary Figure 1:** Resident-intruder aggression and social instigation-heightened aggression.

**Supplementary Figure 2:** Social instigation-heightened aggression and c-Fos in lateral hypothalamus(LH)-DRN projection neurons.

**Supplementary Figure 3:** Additional behavioral data of chemogenetic inhibition of LHb-DRN projection neurons and instigation-heightened aggression presented in Fig. 3.

**Supplementary Figure 4:** Additional behavioral data of optogenetic inhibition of LHb-DRN projection neurons and instigation-heightened aggression presented in Fig. 4.

**Supplementary Figure 5:** Additional behavioral data of optogenetic activation of LHb-DRN projection neurons presented in Fig. 5.

**Supplementary Figure 6:** Activation of LHb-DRN projection and aggressive behavior in other animal facility.

**Supplementary Figure 7:** Additional behavioral data of optogenetic activation of LHb-DRN projection neurons during subthreshold social instigation presented in Fig. 5.

**Supplementary Figure 8:** Additional behavioral data of optogenetic inhibition of DRN 5-HT neurons and instigation-heightened aggression presented in Fig. 6.

**Supplementary Figure 9:** Anterograde tracing of DRN neurons that receive input from the LHb.

**Supplementary Figure 10:** Additional behavioral data of optogenetic activation of DRN-VTA projection neurons presented in Fig. 8.

**Supplementary Figure 11:** Optogenetic stimulation of DRN-VTA projection in EYFP control animals.

**Supplementary Figure 12:** Optogenetic activation of DRN-VTA projection neurons increases aggressive behavior.

**Supplementary Table 1:** Comparison of c-Fos expression in the left and right LHb and LHb-DRN projection neurons.

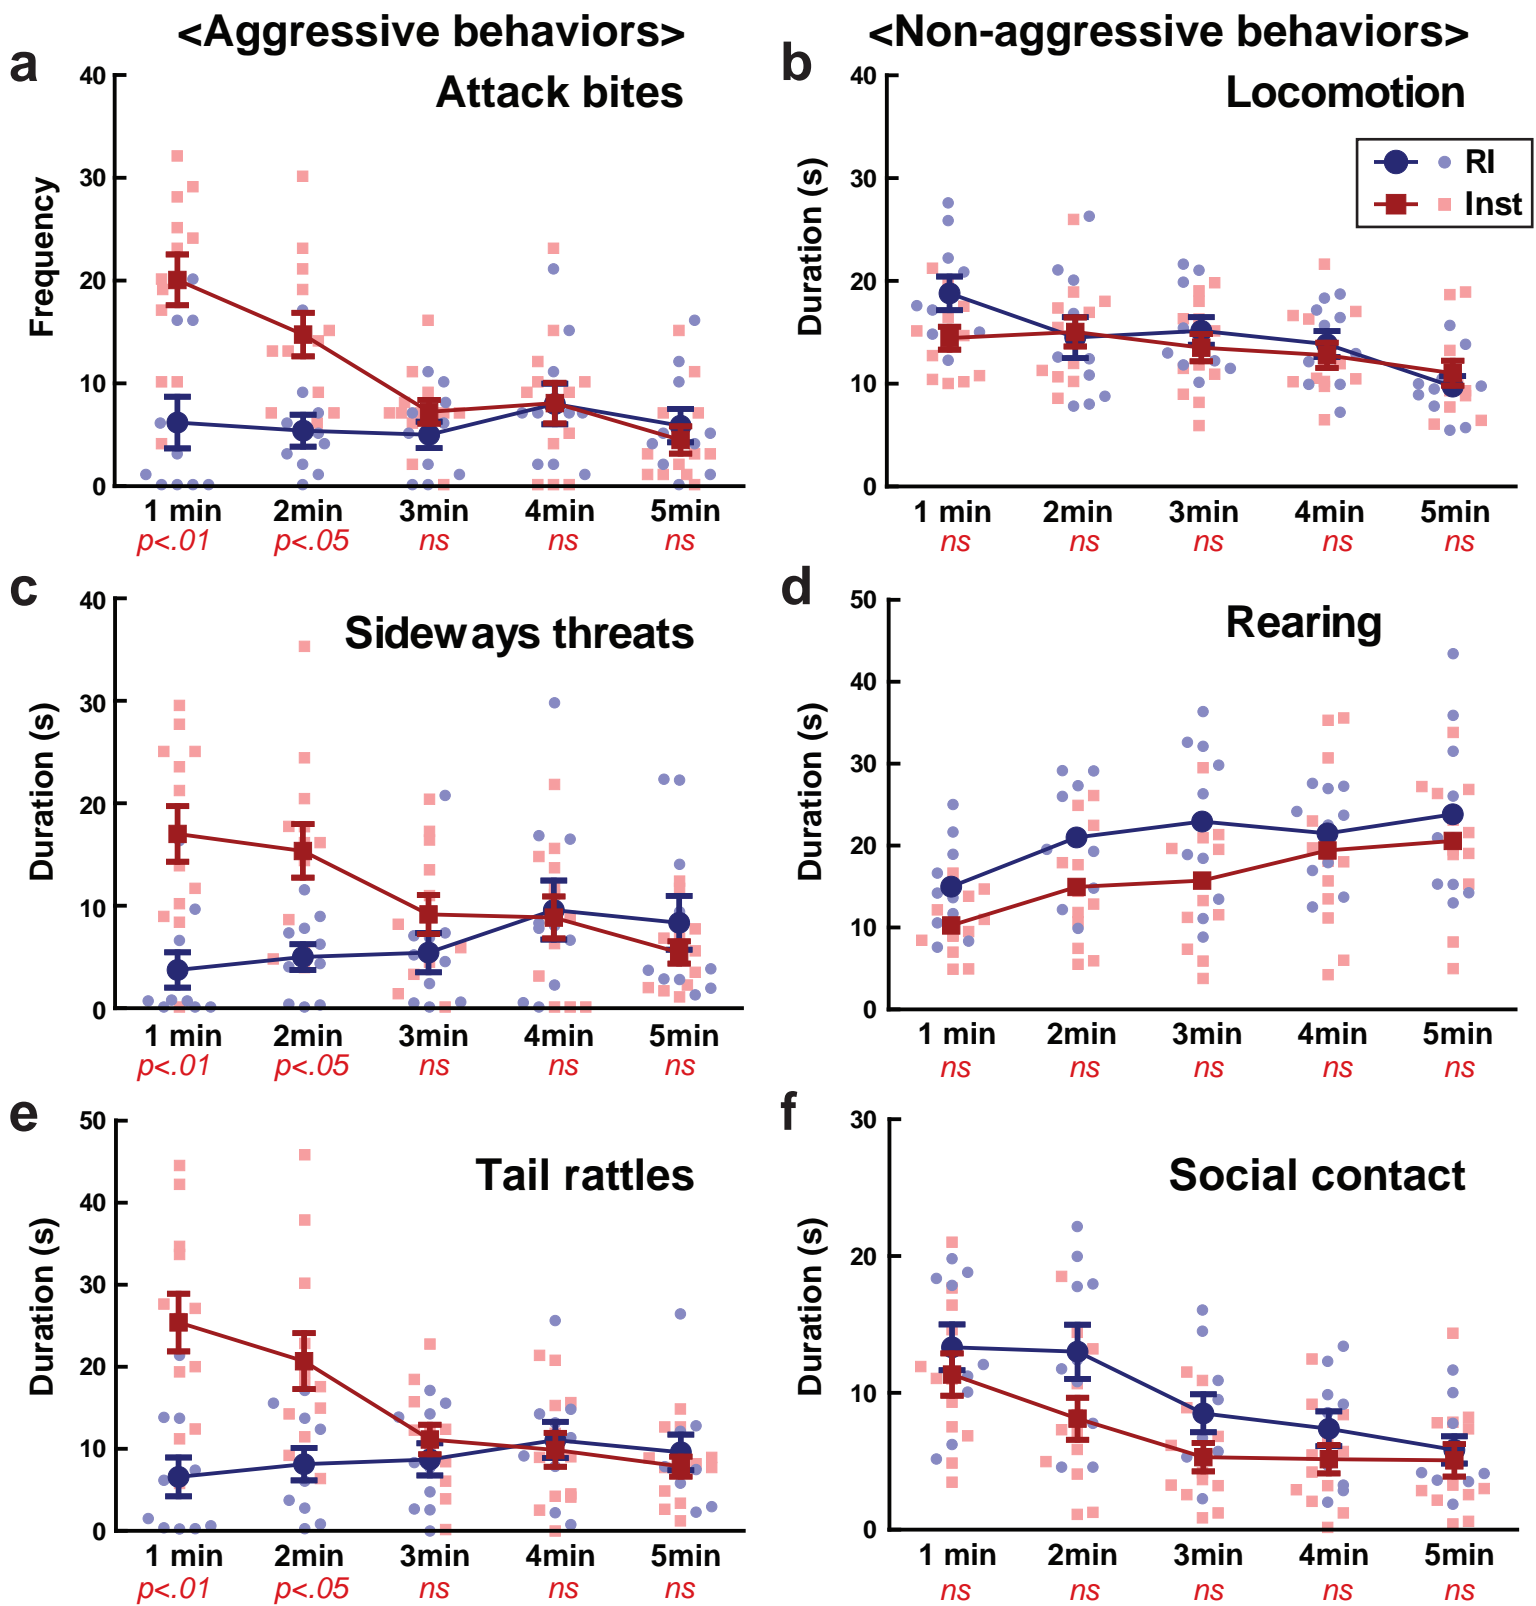

### g Latency

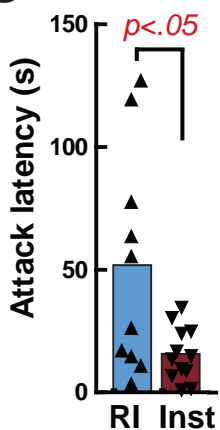

**Supplementary Fig. 1 | Resident-intruder aggression and social instigation-heightened aggression.** a-f, Detailed behavioral characterization of the effect of social instigation. Standard resident-intruder test group (RI, blue) and social instigation group (Inst, red). Left: Aggressive behaviors including attack bites (a), sideways threats (c), and tail rattles (e). Right: non-aggressive behaviors including locomotion (b), rearing (d), and social contact (f). Social instigation increased aggressive behaviors in the first 2 min (two-way repeated measures ANOVA with the Geisser-Greenhouse correction, RI  $n = 10$ , Inst  $n = 12$ , Group  $\times$  Time interaction, attack bites:  $F(4,80)=7.009$ ,  $p < 0.0001$  (a), sideways threats:  $F(4,80)=6.129$ ,  $p = 0.0002$  (c), tail rattles:  $F(4,80)=8.199$ ,  $p < 0.0001$  (e), posthoc t test with Bonferonni's correction (two-sided)). By contrast, social instigation did not change non-aggressive behaviors (b,d,f, two-way repeated measures ANOVA with the Geisser-Greenhouse correction, RI  $n = 10$ , Inst  $n = 12$ , *n.s.*). g, Social instigation significantly reduced attack latency (Mann-Whitney test (two-sided), RI  $n = 10$ , Inst  $n = 12$ ,  $U=29$ ,  $p=0.0426$ ). Each bar represents mean value  $\pm$  SEM. Source data are provided as a Source Data file.

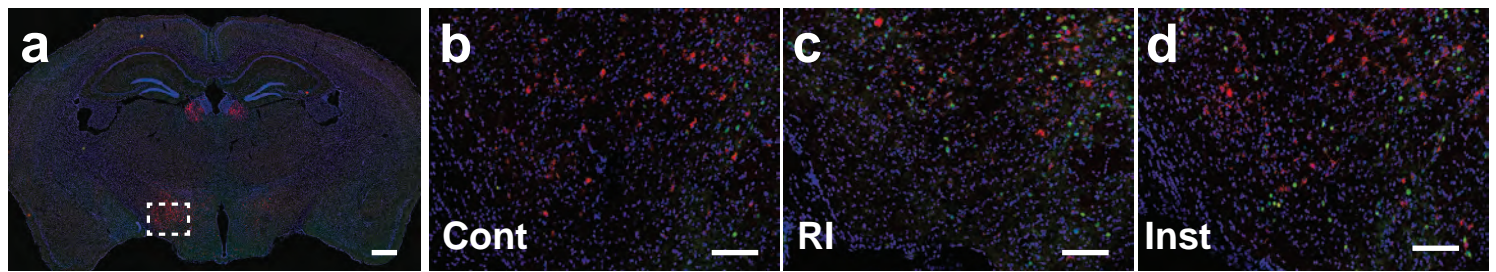

Red: RetroBeads Green: c-Fos Blue: DAPI

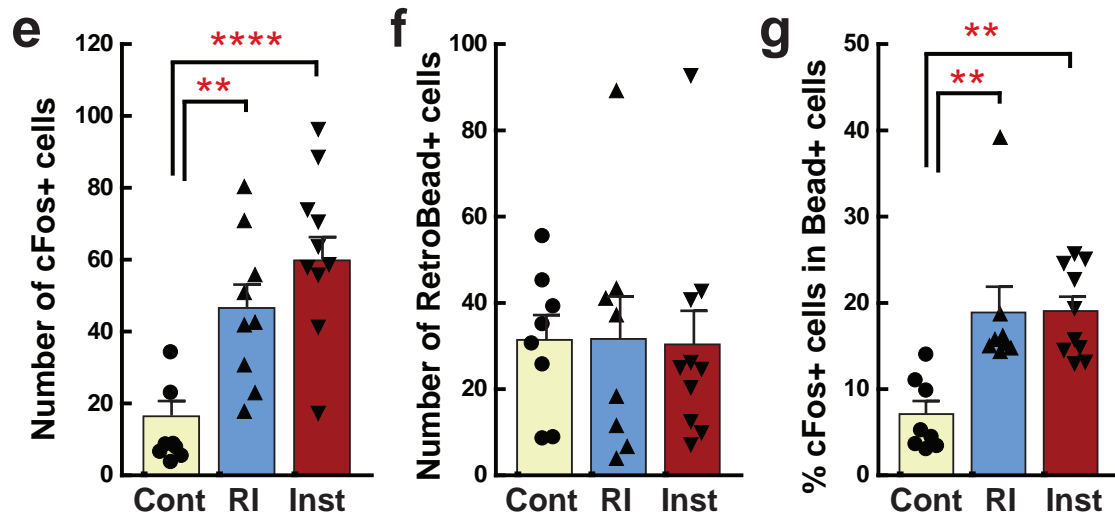

**Supplementary Fig. 2 | Social instigation-heightened aggression and c-Fos in lateral hypothalamus(LH)-DRN projection neurons.** **a**, RetroBead-labeled cells (red) were also observed in the LH (scale bar 500  $\mu$ m). Regular resident-intruder (RI) group was tested for 5 min RI test. Social instigation (Inst) group had 5 min exposure to a caged-instigator male in their homecage prior to 5 min RI test. Control (Cont) animals were kept undisturbed in their homecage. **b-d**, c-Fos expression (green) and RetroBead-labeled cells in the LH of Cont (**b**), RI (**c**), and Inst (**d**) animals. Blue: DAPI (scale bar 100  $\mu$ m). **e**, Both RI and Inst groups showed higher number of c-Fos expressing cells in the LH compared to Cont (one-way ANOVA, Cont  $n = 8$ , RI  $n = 8$ , Inst  $n = 10$ ,  $F(2,23)=17.35$ ,  $p<0.0001$ , posthoc t test with Tukey's multiple comparisons test (two-sided)). **f**, Number of RetroBead-labeled cells in the LHb were not different among groups (one-way ANOVA, Cont  $n = 8$ , RI  $n = 8$ , Inst  $n = 10$ , *n.s.*). **g**, Percent of c-Fos expressing Retrobead-labeled cells were significantly higher in both RI and Inst groups compared to Cont (one-way ANOVA, Cont  $n = 8$ , RI  $n = 8$ , Inst  $n = 10$ ,  $F(2,23)=10.41$ ,  $p=0.0006$ , posthoc t test with Tukey's multiple comparisons test (two-sided)) . \*\* $p<.01$ , \*\*\*\* $p<.0001$ . Error bars indicate S.E.M. Source data are provided as a Source Data file.

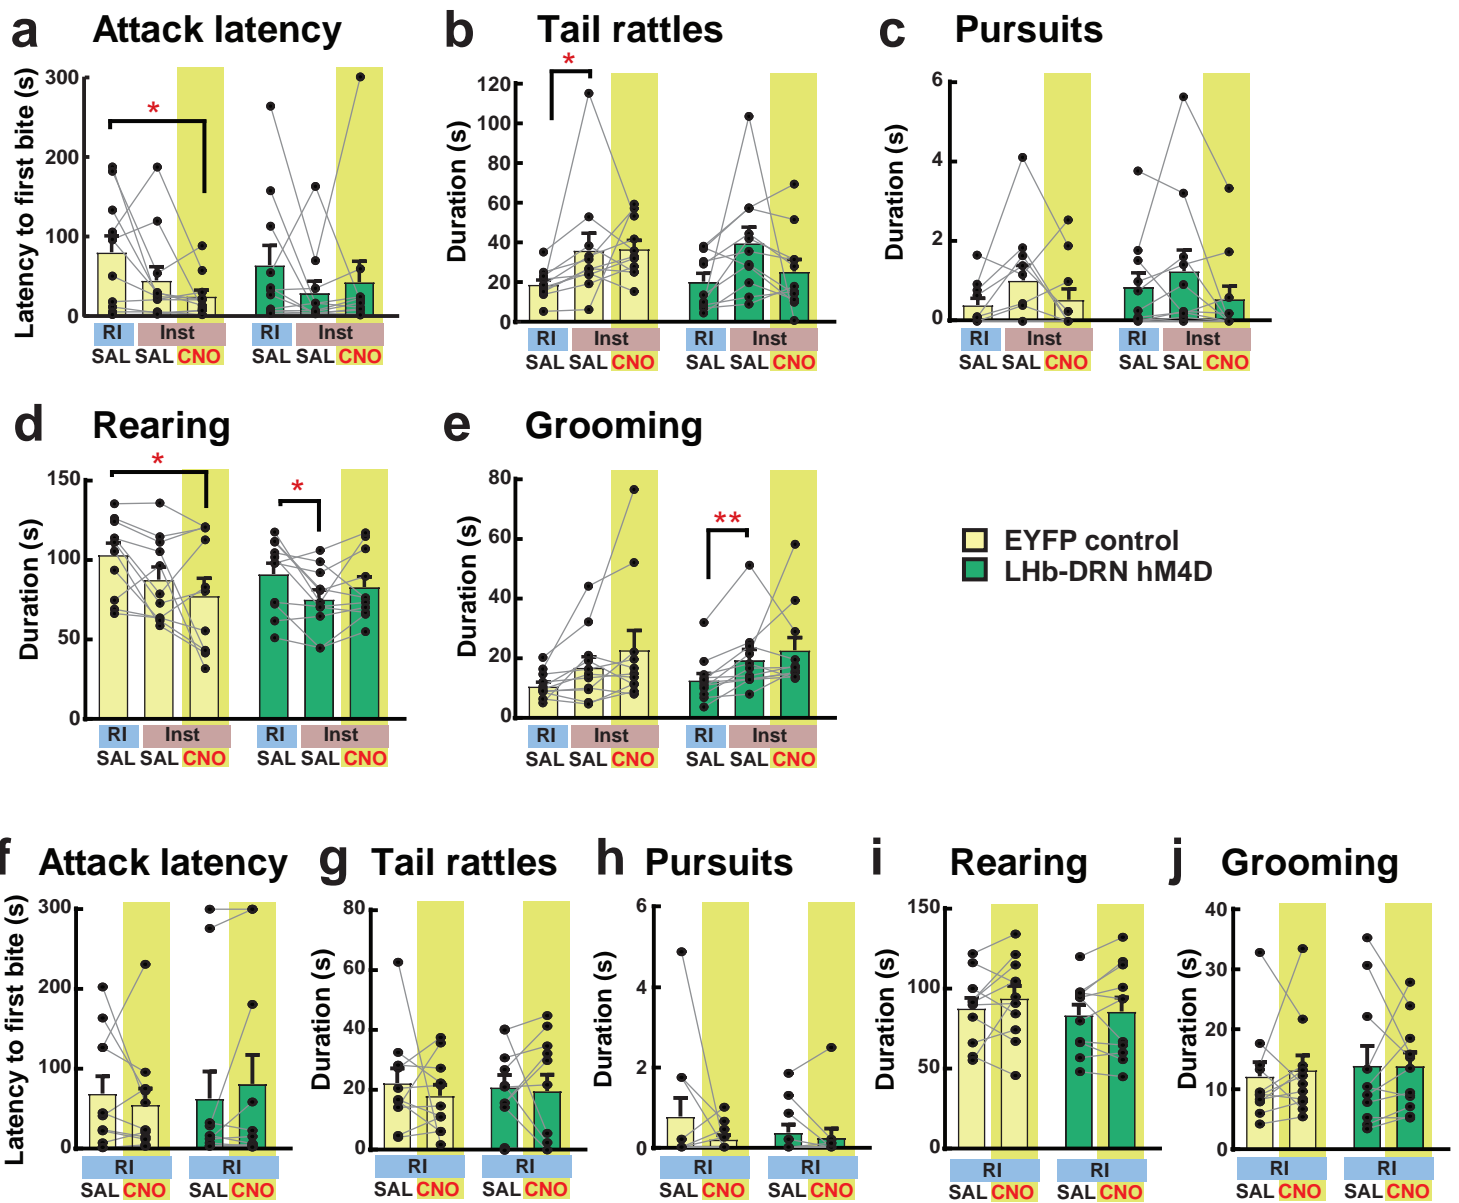

**Supplementary Fig. 3 | Additional behavioral data of chemogenetic inhibition of LHb-DRN projection neurons and instigation-heightened aggression presented in Fig. 3.**

**a-e**, Effect of CNO injection on the Inst test. No significant Group  $\times$  Test-type interaction was observed in attack latency (**a**), tail rattles (**b**), pursuits (**c**), rearing (**d**), and grooming (**e**), but the main effect of Test-type was significant in all behaviors (two-way repeated measures ANOVA with the Geisser-Greenhouse correction, Cont  $n=11$ , hM4D  $n=11$ , attack latency (**a**):  $F(1.708, 34.15)=4.287$ ,  $p=0.0269$ , tail rattles (**b**):  $F(1.483, 29.65)=5.956$ ,  $p=0.0117$ , pursuits (**c**):  $F(1.950, 39.01)=3.638$ ,  $p=0.0366$ , rearing (**d**):  $F(1.819, 39.39)=7.505$ ,  $p=0.0024$ , and grooming (**e**):  $F(1.364, 27.27)=7.926$ ,  $p=0.0049$ , posthoc  $t$  test with Tukey's multiple comparisons tests (two-sided)).

**f-j**, No effect of CNO was observed in the RI test on the attack latency (**f**), the duration of tail rattles (**g**), pursuits (**h**), rearing (**i**), and grooming (**j**) (two-way repeated measures ANOVA, Cont  $n=11$ , hM4D  $n=11$ , all  $n.s.$ ). Each bar represents mean value  $\pm$  SEM, and gray line indicates each individual's data. \*  $p < .05$ , \*\*  $p < .01$ . Source data are provided as a Source Data file.

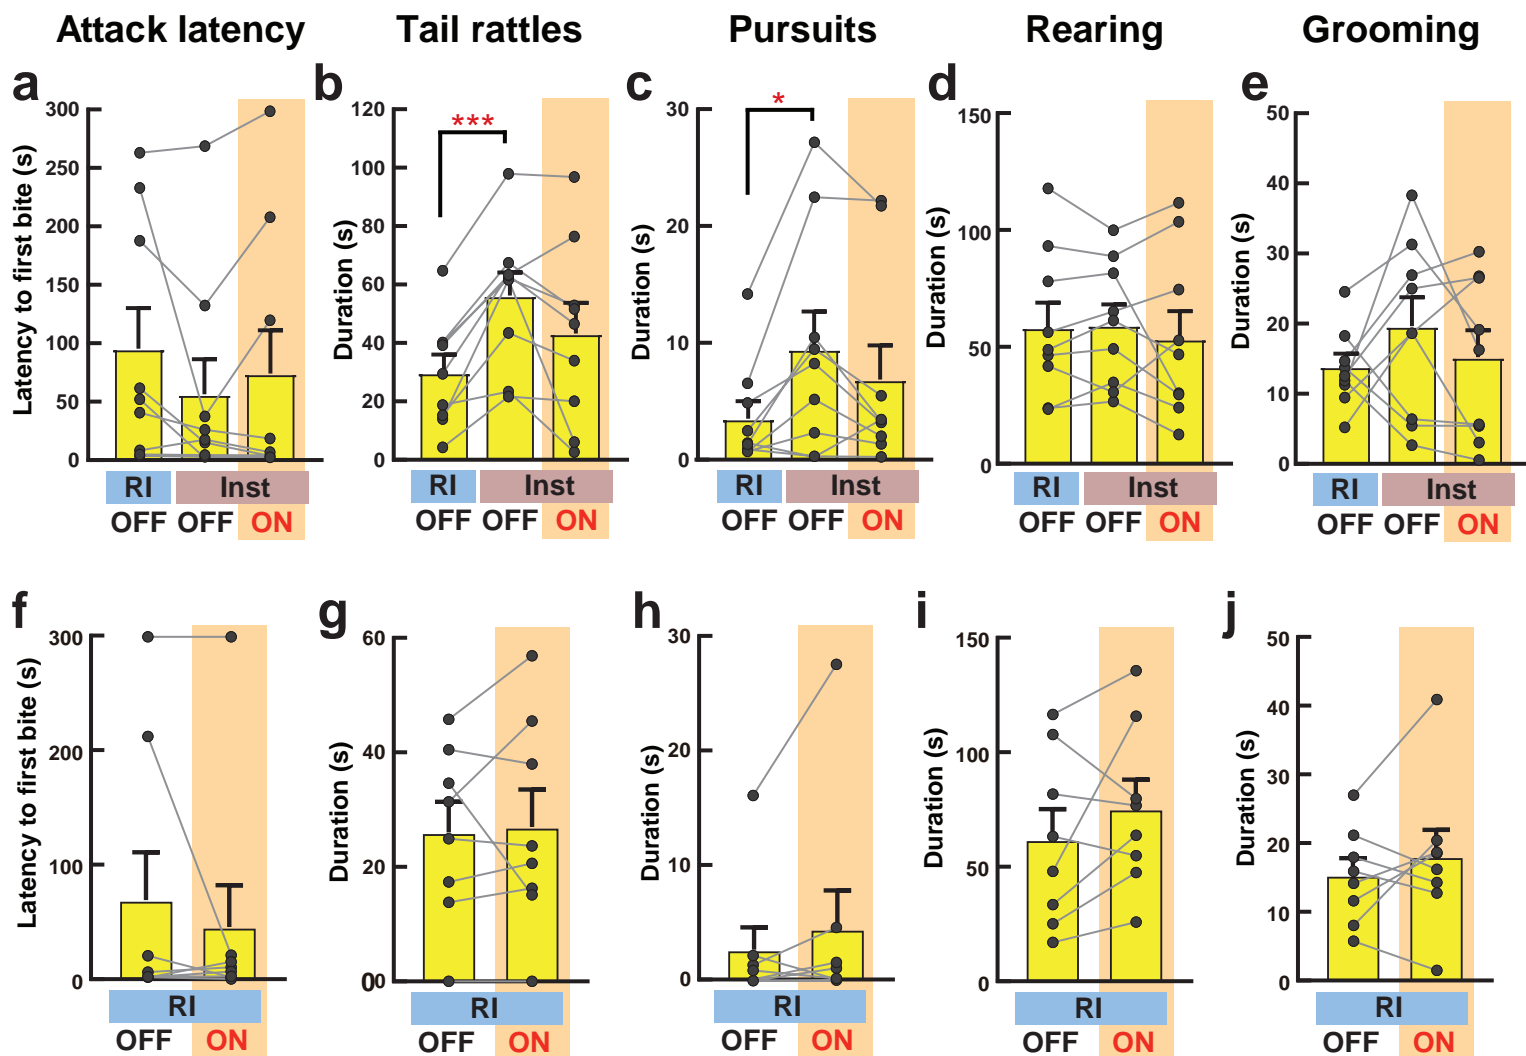

**Supplementary Fig. 4 | Additional behavioral data of optogenetic inhibition of Lhb-DRN projection neurons and instigation-heightened aggression presented in Fig. 4.**

**a-e**, Effect of light stimulation on the Inst test. There was no significant effect of Inst or light stimulation on the attack latency (**a**, Friedman test (two-sided),  $n=10$ , *n.s.*). By contrast, significant increase of aggressive behavior was observed in Inst+OFF but not Inst+ON compared to RI+OFF (tail-rattles (**b**): one-way repeated measures ANOVA,  $n=9$ ,  $F(2,16)=10.95$ ,  $p=0.0026$ , posthoc t test with Tukey's multiple comparisons tests (two-sided), pursuits (**c**): Friedman test (two-sided),  $n=10$ , Friedman statistic=6.889,  $p=0.0307$ , posthoc test with Dunn's multiple comparison test (two-sided)). There were no group differences in the duration of rearing (**d**) or grooming (**e**) (one-way repeated measures ANOVA,  $n=9$ , both *n.s.*). **f-j**, No effect of light stimulation was observed in the RI test on the attack latency (**f**), duration of sideways threats (**g**), pursuits (**h**), rearing (**i**), and grooming (**j**) (paired t test (two-sided),  $n=9$ , all *n.s.*). Each bar represents mean value  $\pm$  SEM, and gray line indicates each individual's data. \*  $p<.05$ , \*\*\* $p<.001$ . Source data are provided as a Source Data file.

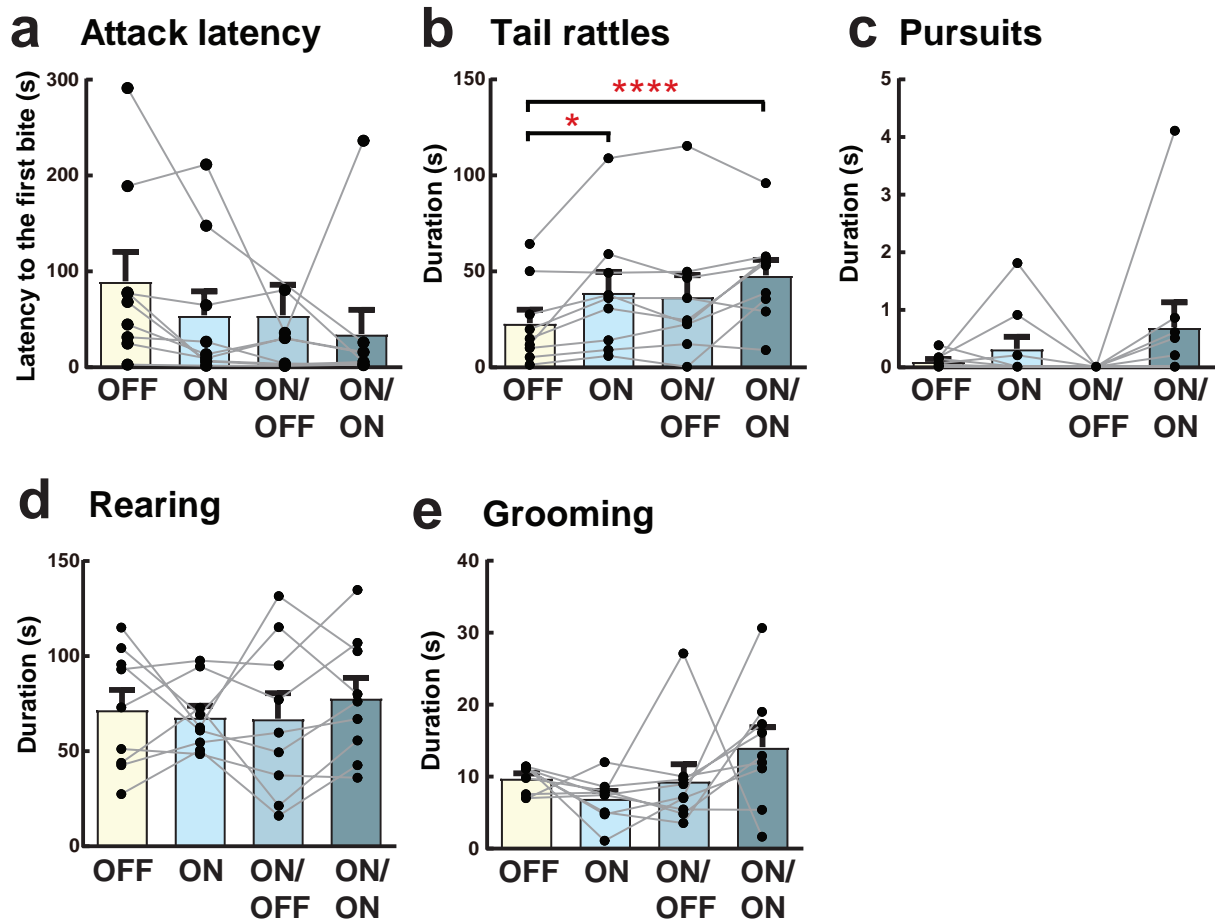

**Supplementary Fig. 5 | Additional behavioral data of optogenetic activation of Lhb-DRN projection neurons presented in Fig. 5.** **a**, Significant effect of light stimulation was not observed in the attack latency (one-way repeated measures ANOVA,  $n = 9$ , *n.s.*). **b-e**, Detailed behavioral analysis data. In addition to attack bites and sideways threats (Fig. 4), tail rattles were significantly increased in ON and ON/ON sessions compared to OFF (**b**, one-way repeated measures ANOVA,  $n = 9$ ,  $F(3,24)=7.497$ ,  $p<0.0001$ , post hoc t test with Tukey's multiple comparisons test (two-sided)). No effect of light stimulation was observed in pursuits (**c**), rearing (**d**), and grooming (**e**) (two-sided Friedman test (**c**) or one-way repeated measures ANOVA (**d,e**),  $n = 9$ , all *n.s.*). Each bar represents mean value  $\pm$  SEM, and gray line indicates each individual's data. \*  $p<.05$ , \*\*  $p<.01$ . Source data are provided as a Source Data file.

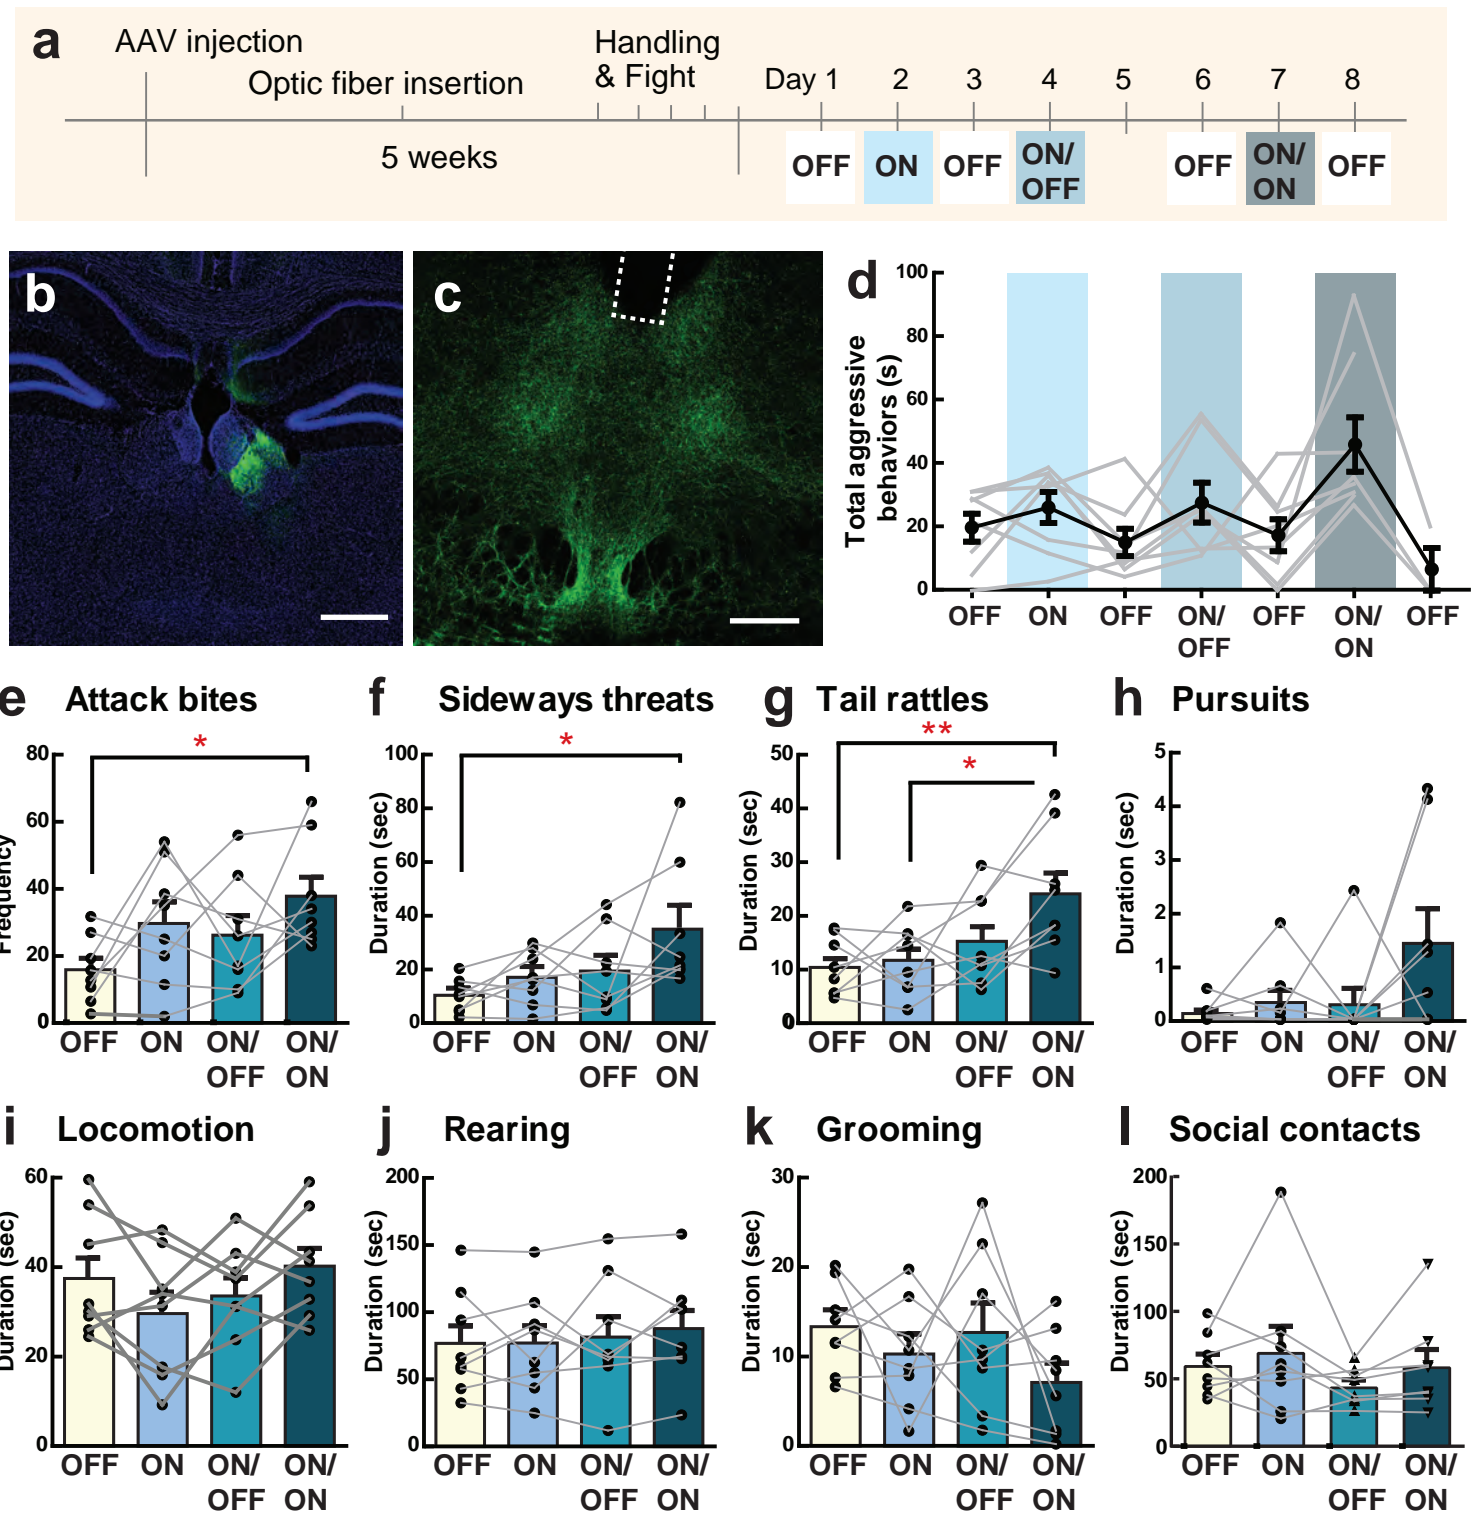

**Supplementary Fig. 6 | Activation of Lhb-DRN projection and aggressive behavior in other animal facility.**

**a**, Time line of this experiment. Experiment was conducted in the animal facility of the Icahn School of Medicine at Mount Sinai. **b-c**, AAV2-hSyn-ChR2-EYFP virus was injected into unilateral Lhb, and optic fiber was inserted into the DRN. Expression of ChR2-EYFP (green) was observed in the Lhb (**b**, scale bar 500  $\mu$ m), and the projection terminals were observed in the DRN (**c**, scale bar 200  $\mu$ m). Animals that express ChR2 in the left and right Lhb were combined because there was no difference between the sides. Light stimulation schematics were same as Fig. 4. **d**, Duration of total aggressive behaviors in each session. Black line indicates average data of 9 animals (Mean  $\pm$  SEM), and gray line indicates each individual's data. **e-l**, Detail behavioral analysis showed that ON/OFF session significantly increased aggressive components of behaviors compared to OFF sessions (one-way repeated measures ANOVA,  $n = 8$ , attack bites:  $F(3,21)=3.330$ ,  $p=0.0392$  (**e**), sideways treats:  $F(3,21)=4.141$ ,  $p=0.0188$  (**f**), tail rattles:  $F(3,21)=5.993$ ,  $p=0.0041$  (**g**), pursuit: *n.s.* (**h**), post hoc t test with Tukey's multiple comparisons test (two-sided)). **i-l**, There were no effect of light stimulation on non-aggressive behaviors (locomotion (**i**), rearing (**j**), grooming (**k**), and social contacts (**l**) (one-way repeated measures ANOVA,  $n = 8$ , all *n.s.*). Each bar represents mean value  $\pm$  SEM, and gray line indicates each individual's data. \*  $p < .05$ , \*\*  $p < .01$ . Source data are provided as a Source Data file.

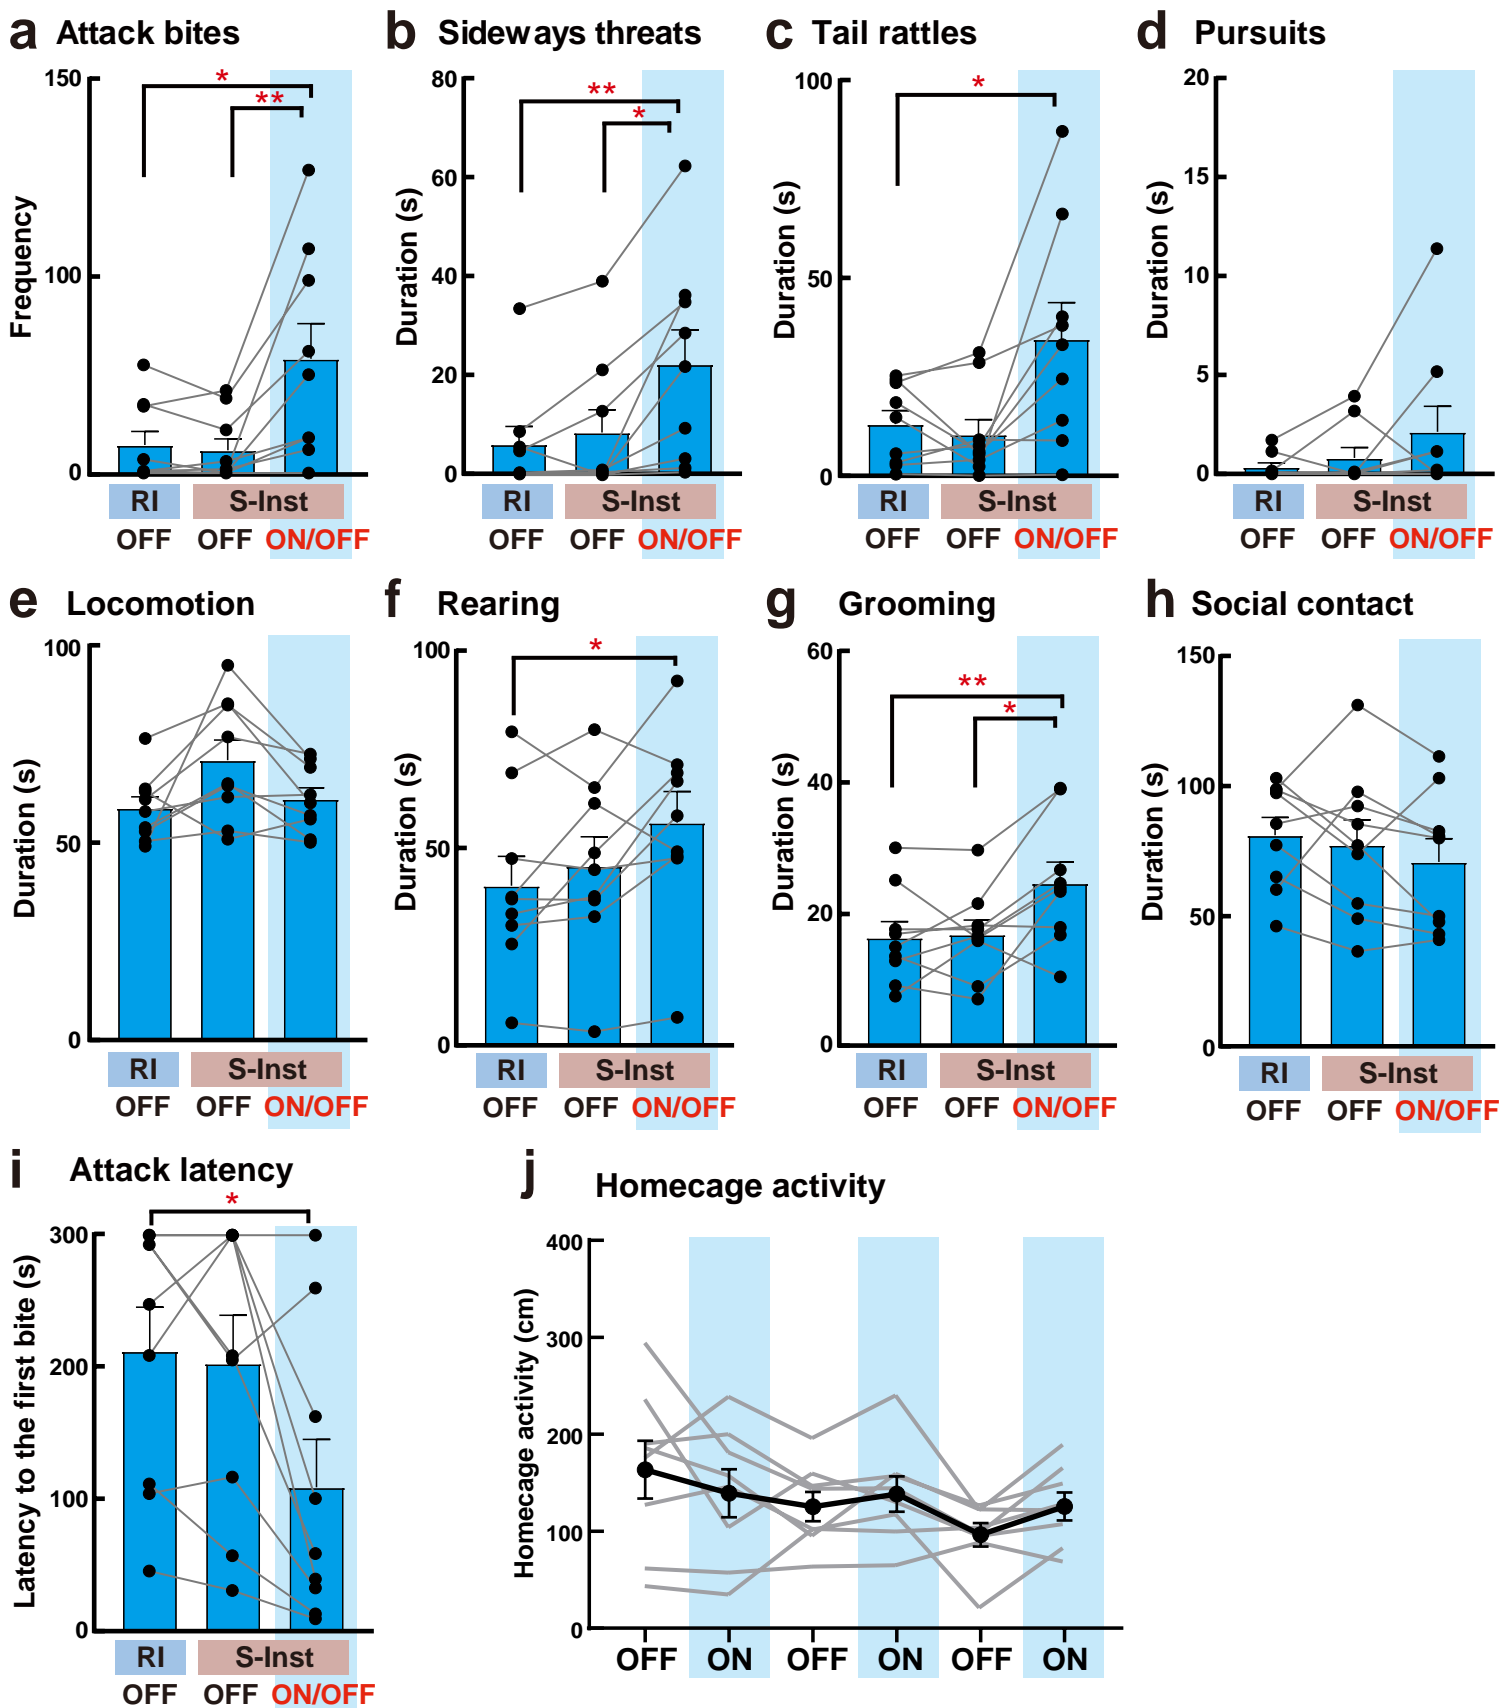

**Supplementary Fig. 7 | Additional behavioral data of optogenetic activation of Lhb-DRN projection neurons during subthreshold social instigation presented in Fig. 5.** Subthreshold social instigation (S-Inst) itself did not affect any behaviors without light stimulation, but a combination of S-Inst with ON/OFF stimulation significantly increased aggressive components of behaviors (**a-d**, Friedman test (two-sided),  $n = 9$ , attack bites (**a**): Friedman statistic=12.45,  $p=0.0005$ , sideways threats (**b**): Friedman statistic=14.82,  $p<0.0001$ , tail rattles (**c**): Friedman statistic=8.222,  $p=0.0158$ , but pursuit (**d**): *n.s.*, posthoc test with Dunn's multiple comparison test (two-sided)) as well as some non-aggressive behaviors (**e-h**, one-way repeated measures ANOVA,  $n = 9$ , locomotion (**e**):  $F(1.533,12.26)=4.609$ ,  $p=0.0398$ , rearing (**f**):  $F(1.889,15.11)=5.918$ ,  $p=0.0136$ , grooming (**g**):  $F(1.710,13.68)=8.101$ ,  $p=0.0062$ , social contact (**h**): *n.s.*, post hoc t test with Tukey's multiple comparisons test (two-sided)). **i**, There was a significant group difference in the attack latency (one-way repeated measures ANOVA,  $n=9$ ,  $F(1.543,12.34)=7.824$ ,  $p=0.0092$ , post hoc t test with Tukey's multiple comparisons test (two-sided)). **j**, Spontaneous activity in the homeage was not affected by Lhb-DRN activation (paired t test between OFF average and ON average (two-sided),  $n=8$ , *n.s.*). Each bar represents mean value  $\pm$  SEM, and gray line indicates each individual's data. \*  $p<.05$ , \*\*  $p<.01$ . Source data are provided as a Source Data file.





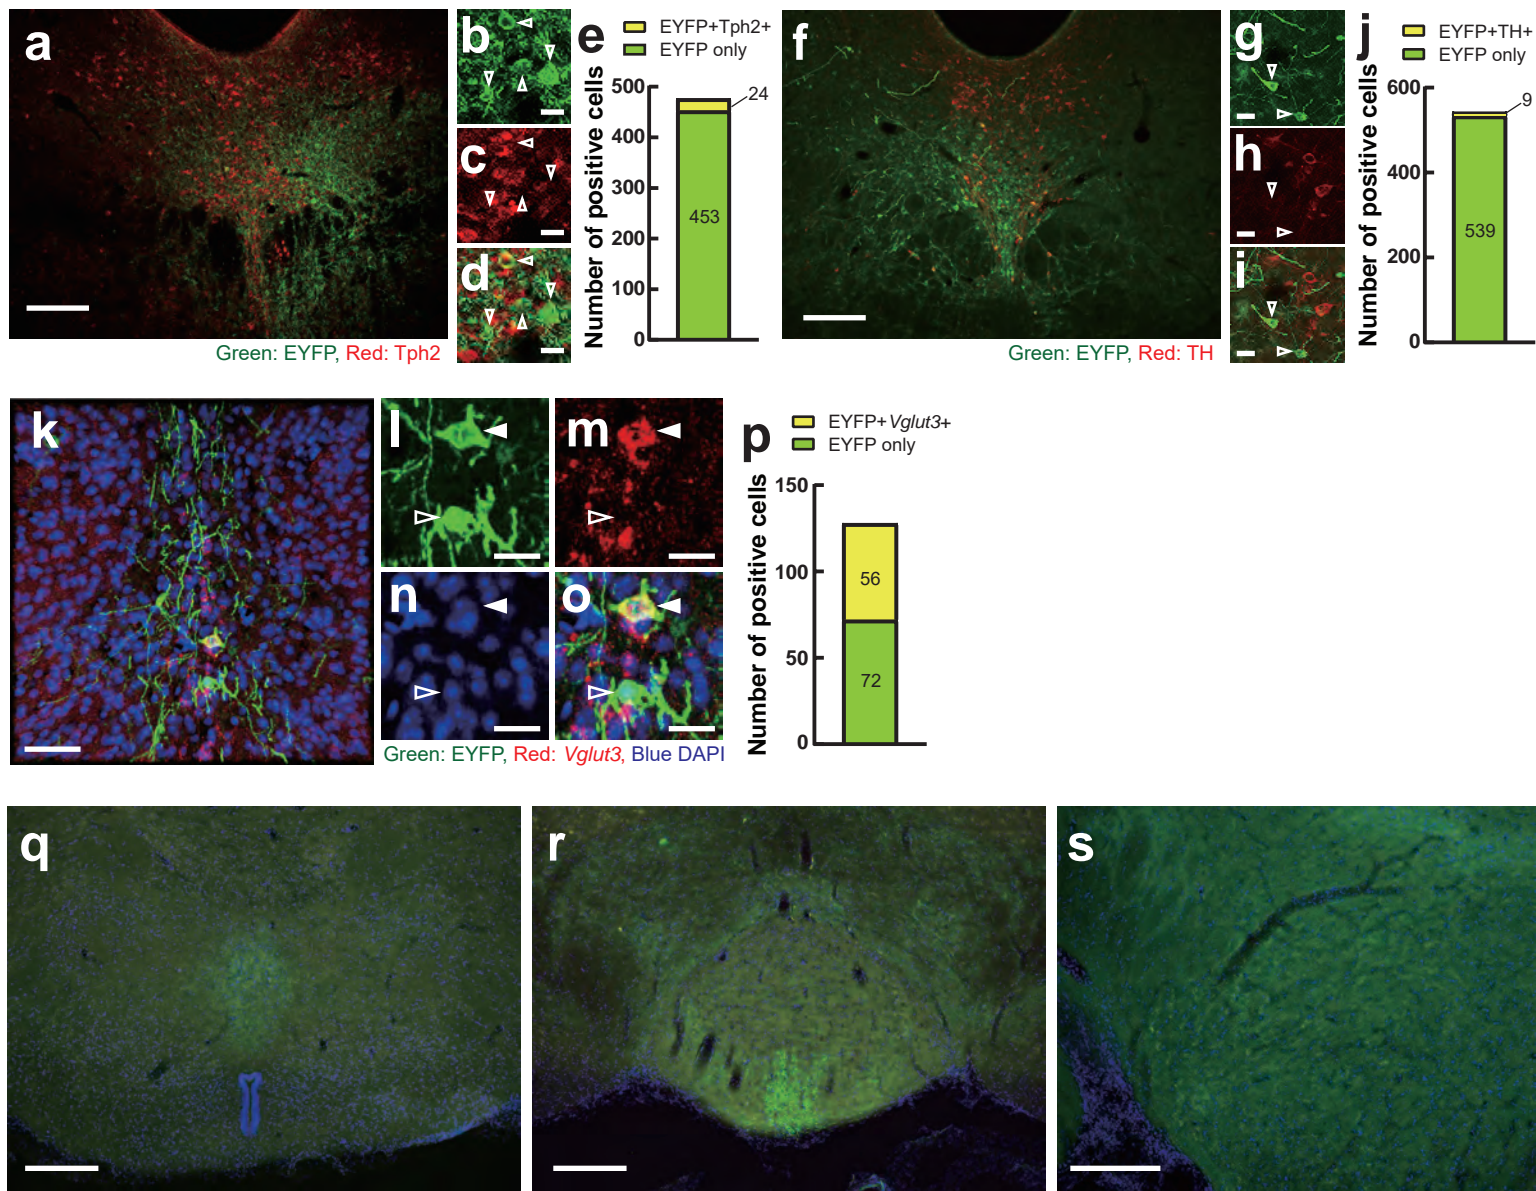

**Supplementary Fig. 9 | Anterograde tracing of DRN neurons that receive input from the LHb.** AAV1-Cre was injected into unilateral LHb and Cre-dependent AAV2-EF1 $\alpha$ -DIO-eNpHR3.0-EYFP (referred below as EYFP) was injected into the DRN (Fig. 6h). **a**, EYFP-expressing cells (green) and Tph2-ir+ cells (red) were observed in the DRN (scale bar 200  $\mu$ m). **b-d**, Enlarged pictures of EYFP (**b**), Tph2 (**c**), and their merge (**d**) (scale bar 20  $\mu$ m). Most of EYFP expressing cells (arrow heads) did not colocalize with Tph2+ cells. **e**, Ratio of EYFP+ cells that co-localized with Tph2 (yellow, 24 cells (5.3%)) and without Tph2 (green, 453 cells (94.7%)) in the DRN (n=3 animals). **f**, EYFP-expressing cells (green) and TH-ir+ cells (red) were observed in the DRN (scale bar 200  $\mu$ m). **g-i**, Enlarged pictures of EYFP (**g**), TH (**h**), and their merge (**i**) (scale bar 20  $\mu$ m). Most of EYFP expressing cells (arrow heads) did not colocalize with TH+ cells. **j**, Ratio of EYFP+ cells that co-localized with TH (yellow, 9 cells (1.7%)) and without TH (green, 534 cells (98.3%)) in the DRN (n=3 animals). **k**, EYFP-expressing cells (green) and *Vglut3* mRNA positive cells (red) were visualized in the DRN by in situ hybridization (scale bar 50  $\mu$ m). **l-o**, Enlarged pictures of EYFP (**l**), *Vglut3* (**m**), DAPI (**n**) and their merge (**o**) (scale bar 20  $\mu$ m). Arrowheads indicate *Vglut3*+ EYFP+ cells (filled) and *Vglut3*- EYFP+ cells (without fill). **p**, Ratio of EYFP+ cells that co-localized with *Vglut3* (yellow, 56 cells (43.8%)) and without *Vglut3* (green, 72 cells (56.2 %)) in the DRN (n=3 animals). **q-s**, EYFP projection terminals. In addition to the VTA and LHb (Fig. 6), EYFP-expressing fibers (green) were observed in the medial mammillary nucleus (**q**, scale bar 200 $\mu$ m), caudal and lateral interpeduncular nucleus (**r**, 200 $\mu$ m), and sparsely in the lateral hypothalamus (**s**, scale bar 200 $\mu$ m). Source data are provided as a Source Data file.

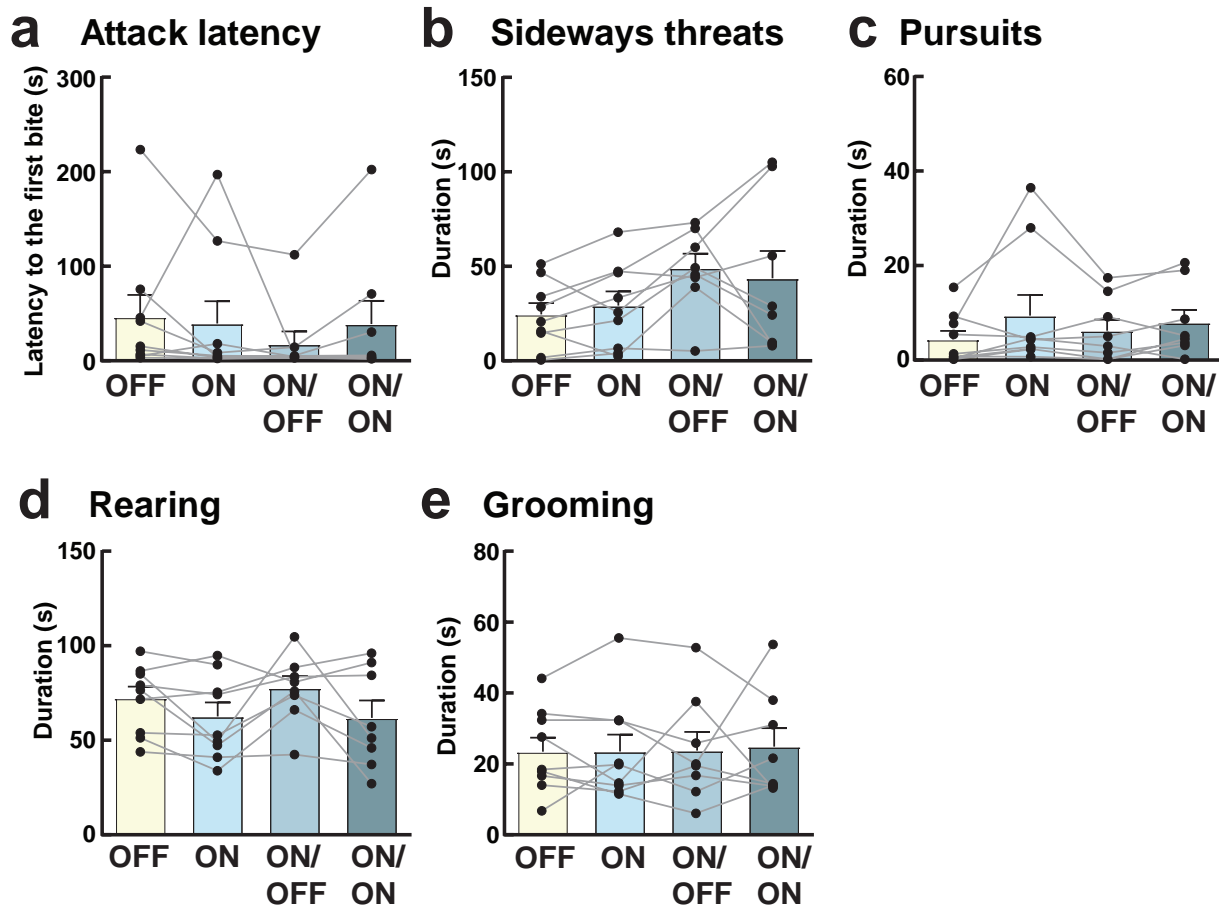

**Supplementary Fig. 10 | Additional behavioral data of optogenetic activation of DRN-VTA projection neurons presented in Fig. 8.** **a**, No significant effect of light stimulation was not observed in the attack latency (Mixed-effects analysis (two-sided),  $n=9$ , *n.s.*). **b-e**, Detailed behavioral analysis data. No significant effect of light stimulation was observed in these behaviors (Mixed-effects analysis (two-sided),  $n=9$ , all *n.s.*). Each bar represents mean value  $\pm$  SEM, and gray line indicates each individual's data. Source data are provided as a Source Data file.

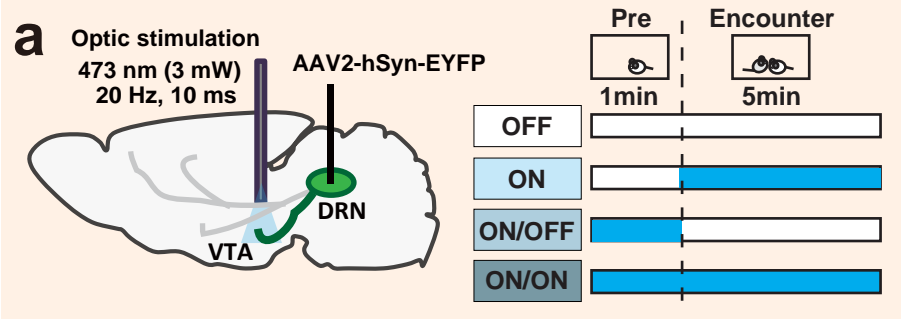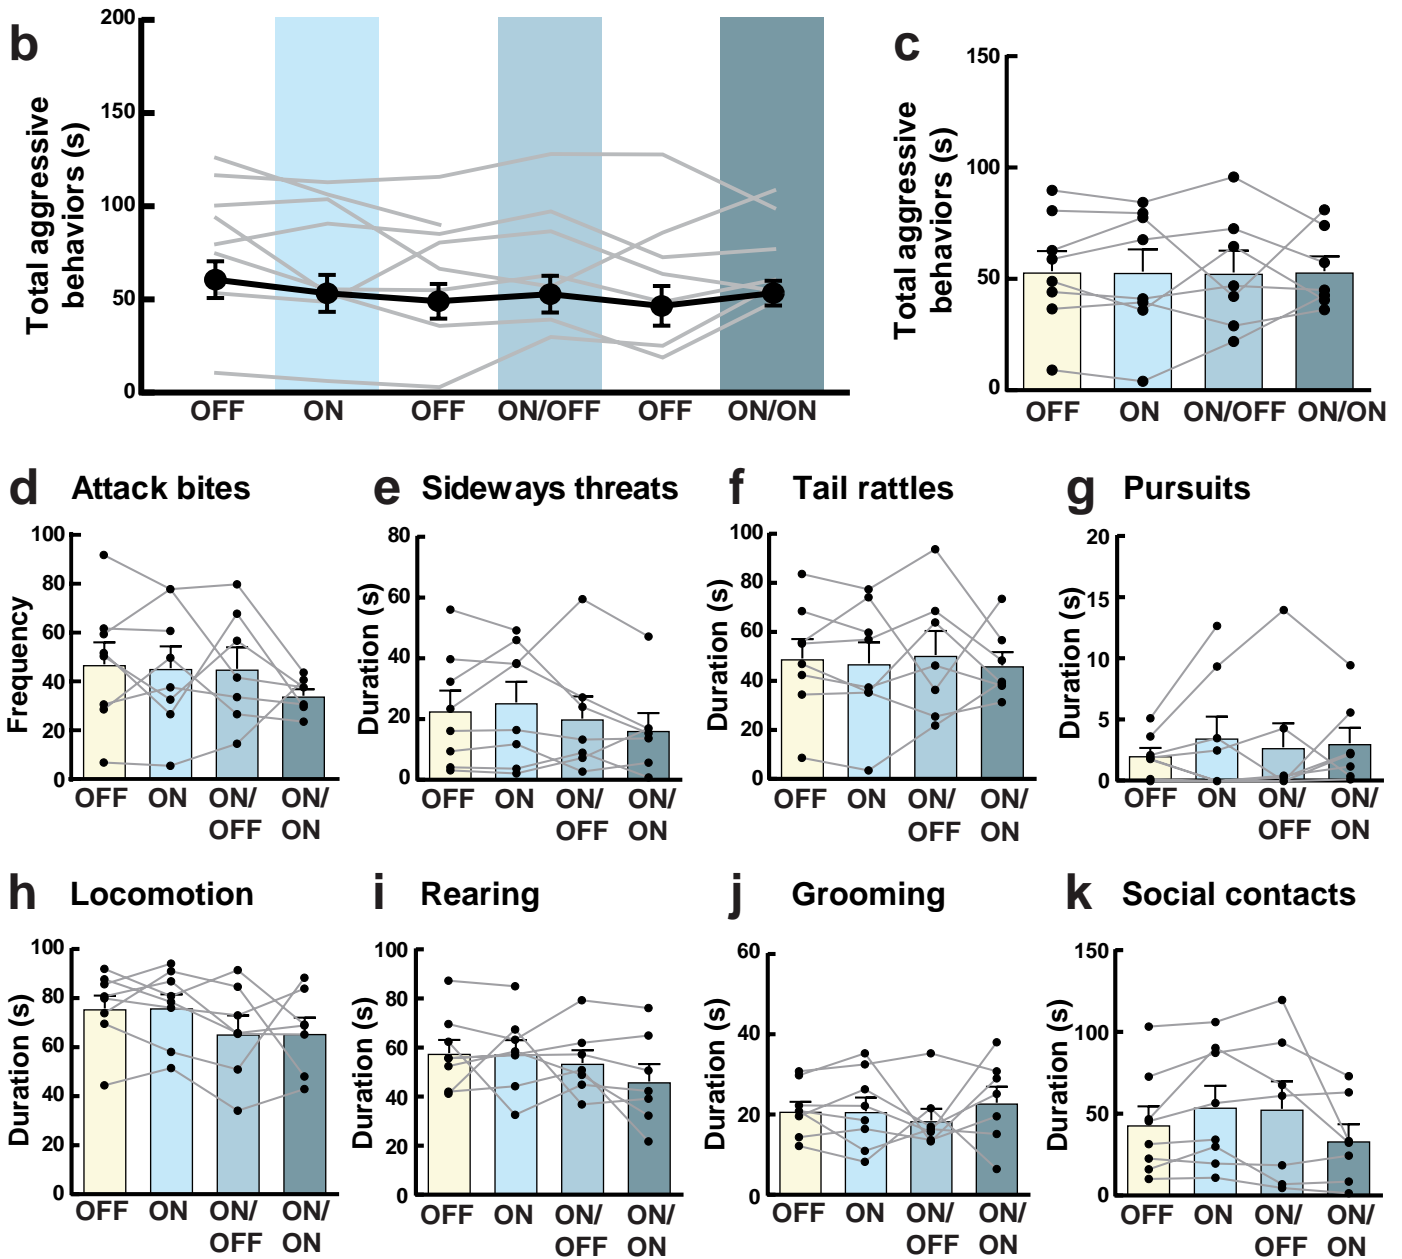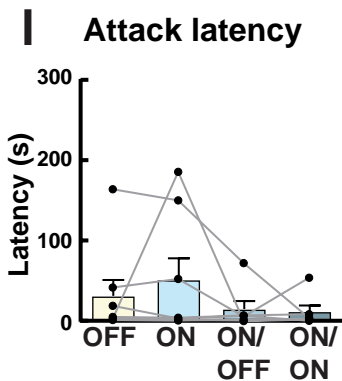

**Supplementary Fig. 11 | Optogenetic stimulation of DRN-VTA projection in EYFP control animals.** **a**, Schematics of this experiment. AAV2-hSyn-EYFP was injected in the DRN, and optic fiber was inserted into the VTA. **b-c**, No effect of light stimulation on the duration of total aggressive behavior (Mixed-effects analysis (two-sided),  $n=8$ , *n.s.*). **d-k**, Detailed behavioral analysis data also showed no significant effect of light stimulation on neither aggressive and non-aggressive behaviors (Friedman test (**d,l**) or Mixed-effects analysis (**e-k**), both two-sided,  $n=8$ , all *n.s.*). **l**, No effect of light stimulation on the attack latency (Friedman test (two-sided),  $n=8$ , all *n.s.*). Each bar represents mean value  $\pm$  SEM, and gray line indicates each individual's data. Source data are provided as a Source Data file.

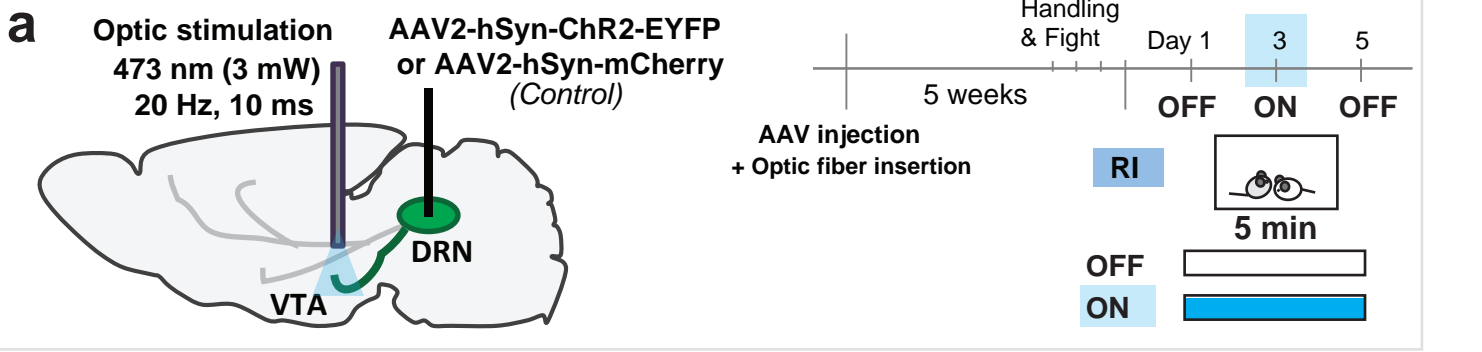

**Total aggression**    **Attack bites**    **Sideways threats**    **Locomotion**    **Social contact**

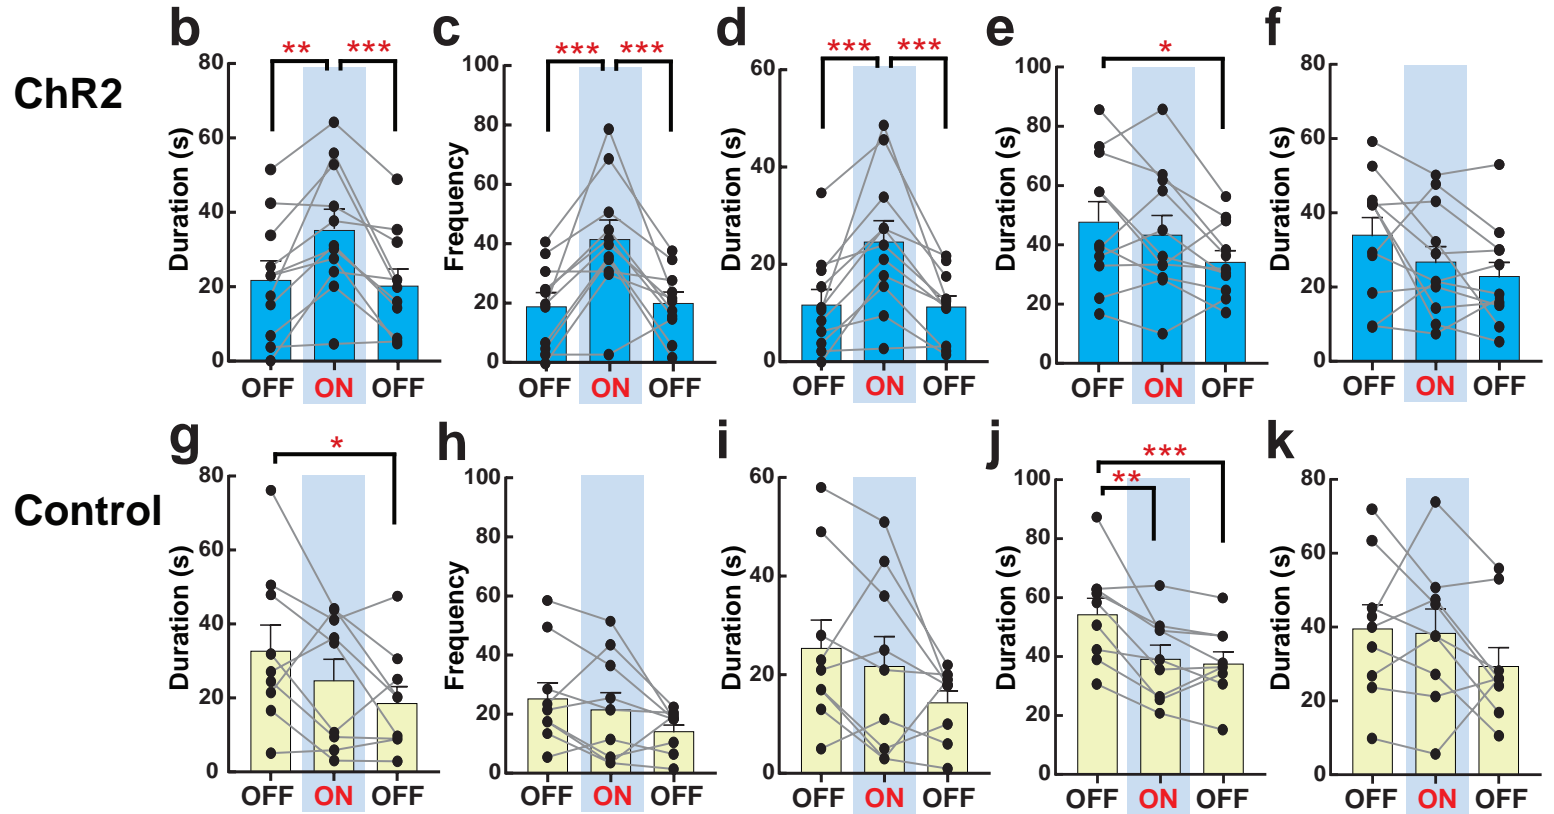

**Supplementary Fig. 12 | Optogenetic activation of DRN-VTA projection neurons increases aggressive behavior.** **a**, Schematics and timeline of this experiment. Either AAV2-hSyn-ChR2-EYFP or AAV2-hSyn-mCherry (control) was injected into the DRN. RI test was conducted every other day, optic stimulation was delivered to the DRN on Day 3 (473 nm, 20 Hz, 10 ms pulse, 3 mW). **b-k**, Behaviors of DRN-VTA ChR2 group (**b-f**) and mCherry control group (**g-k**). ON session showed a significant increase in aggressive behaviors compared to OFF sessions in the ChR2 group (**b-d**), but not in mCherry control group (**g-i**) (two-way repeated measures ANOVA, ChR2 n=11, mCherry n=9, Group × Day interaction; total aggressive behaviors:  $F(2,36)=5.625$ ,  $p=0.0075$  (**b,g**), attack bites:  $F(2,36)=8.281$ ,  $p=0.0011$  (**c,h**), sideways threats:  $F(2,36)=4.742$ ,  $p=0.0149$  (**d,i**), posthoc t test with Tukey's multiple comparison tests (two-sided)). By contrast non-aggressive behaviors only showed day-by-day reduction in ChR2 group and mCherry group (two-way repeated measures ANOVA, ChR2 n=11, mCherry n=9, main effect of Day; locomotion:  $F(2,36)=14.22$ ,  $p<0.0001$  (**e,j**), social contact:  $F(2,36)=4.643$ ,  $p=0.0161$  (**f,k**), posthoc t test with Tukey's multiple comparison tests (two-sided)). Each bar represents mean value ± SEM, and gray line indicates each individual's data. \*  $p<.05$ , \*\*  $p<.01$ , \*\*\* $p<.001$ . Source data are provided as a Source Data file.

**Supplementary Table 1** Comparison of c-Fos expression in the left and right LHb and LHb-DRN projection neurons

|         | # of cFos+ cells |          | # of Retrobead+ cells |          | # of c-Fos+ & Retrobead+ cells |          |
|---------|------------------|----------|-----------------------|----------|--------------------------------|----------|
|         | Left             | Right    | Left                  | Right    | Left                           | Right    |
| Control | 21.1±4.4         | 21.3±3.4 | 2.9±0.9               | 2.9±0.8  | 20.2±6.3                       | 24.9±8.4 |
| RI      | 48.6±5.3         | 47.4±4.8 | 11.7±4.5              | 10.8±3.8 | 21.9±7.1                       | 23.6±7.0 |
| Inst    | 49.8±2.4         | 48.7±2.9 | 13.4±3.2              | 14.4±3.7 | 22.3±8.5                       | 21.9±7.7 |
